# Supplementary material for: First in vivo analysis of the regulatory protein CP12 of the model cyanobacterium Synechocystis PCC 6803: Biotechnological implications
Source: Frontiers journal article supplement (doi:10.3389/fpls.2022.999672), 2022-09-13
Supplement: Data_Sheet_1.PDF [file Data_Sheet_1.PDF]

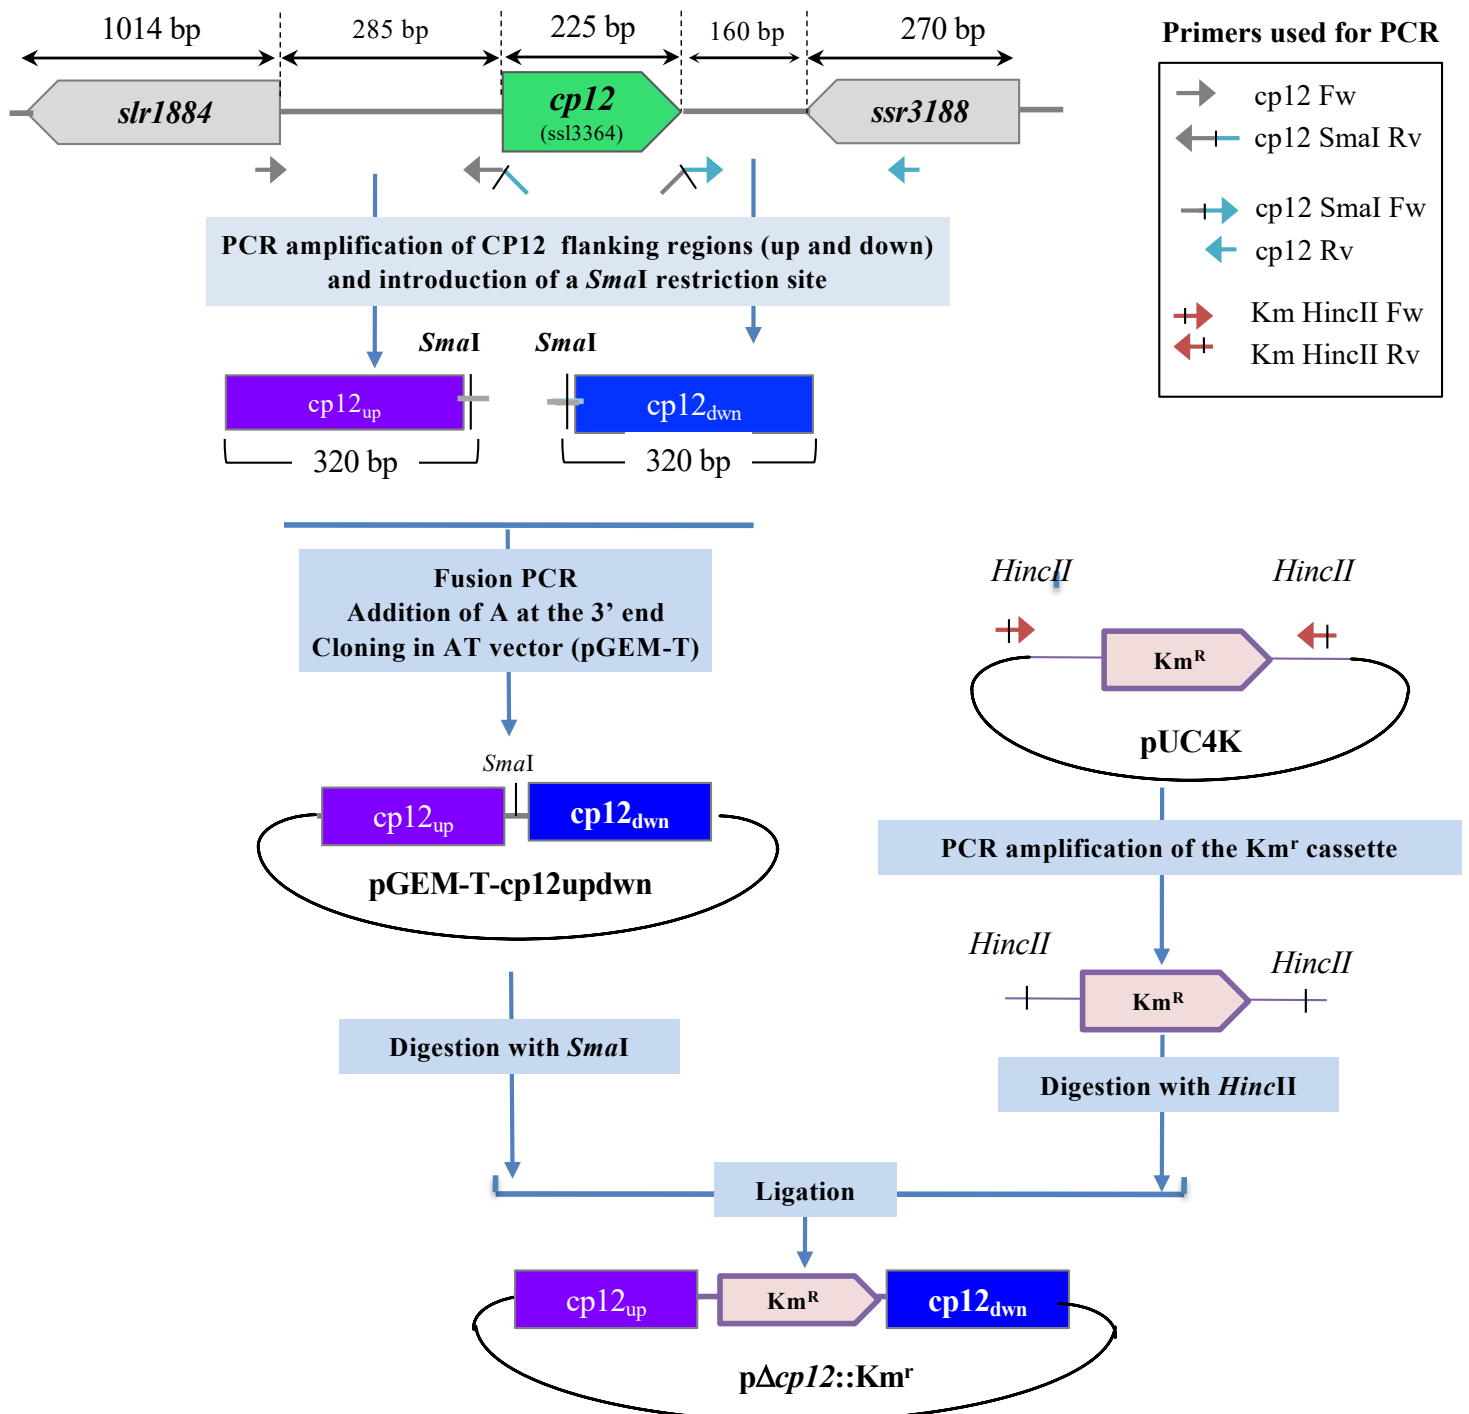

**Supplementary Figure S1. Schematic representation of the *Synechocystis* PCC 6803 *cp12* chromosome locus and construction of the  $\Delta cp12::Km^r$  DNA cassette for targeted deletion of the *cp12* gene.** The genes are represented by large arrows respectively colored in green for *cp12* (also referred to as *ssl3364* in Cyanobase), red for *Km<sup>r</sup>* and grey (*cp12*-surrounding genes designated as *slr1884* and *ssr3188* in Cyanobase). For the sake of clarity, the *cp12*-flanking regions that served as platform of homology for DNA recombination mediating gene replacement are indicated by purple and blue rectangles, respectively.
